# Supplementary material for: Changes in cardiovascular mortality in Chile during the COVID-19 pandemic
Source: HighWire-hosted journal article supplement (doi:10.1136/heartjnl-2021-320082), 2022-02-01
Supplement: heartjnl-2021-320082supp001_data_supplement.pdf [file heartjnl-2021-320082supp001_data_supplement.pdf]

## Supplementary material

**Figure S.1.a.** Observed and predicted numbers of cardiovascular deaths between 2015 and 2020, Chile.

Panel A. Both sexes

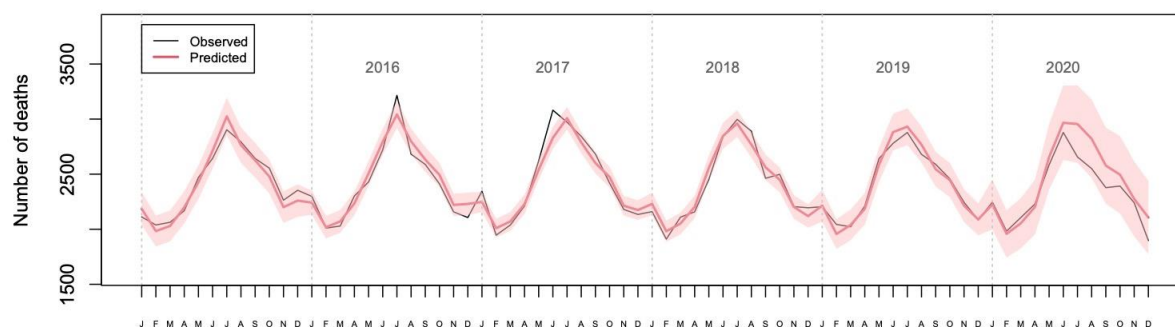

Panel B. Male

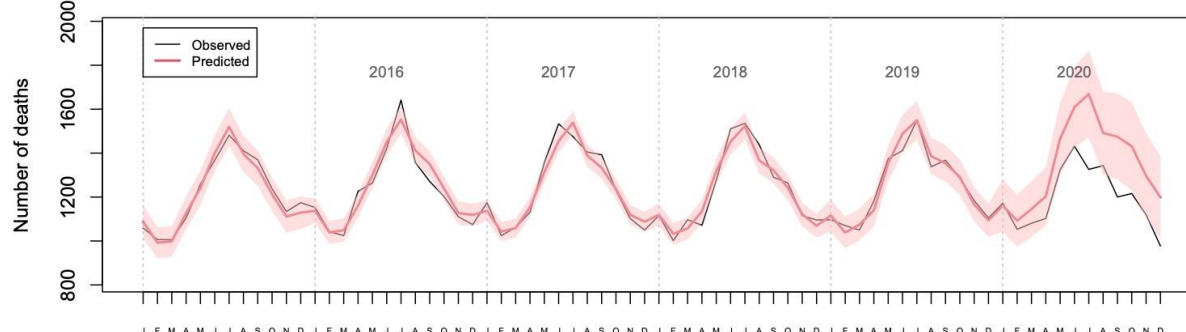

Panel C. Female

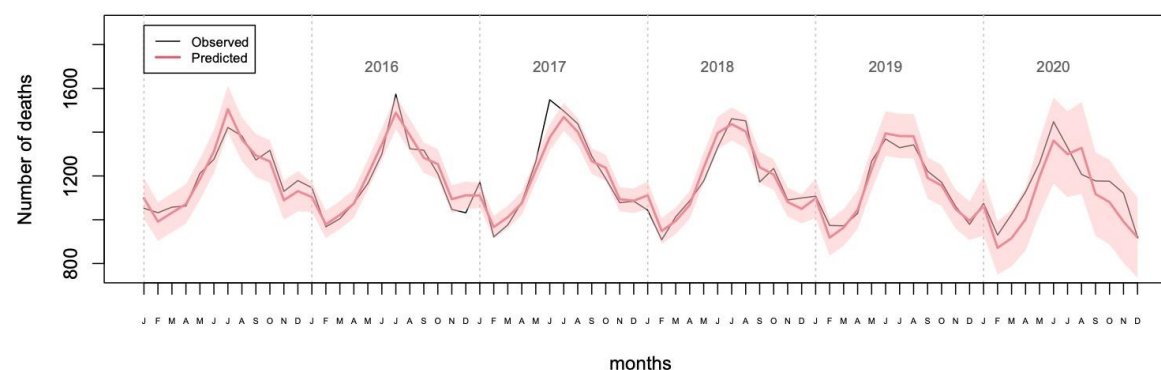

The selected model after the backward procedure for both sexes, men and female was the same:

$$\text{number of deaths} = B_0 \text{intercept} + B_1 \text{month}^2 + B_2 \text{month}^3 + B_3 \text{Feb} + B_4 \text{Mar} + B_5 \text{Apr} + B_6 \text{May} + B_7 \text{Jun} + B_8 \text{Jul} + B_9 \text{Aug} + B_{10} \text{Sep} + B_{11} \text{Oct} + B_{12} \text{Nov} + B_{13} \text{Dic} + B_{14} \text{year} + B_{15} \text{Feb:year} + B_{17} \text{Mar:year} + B_{17} \text{Apr:year} + B_{18} \text{May:year} + B_{19} \text{Jun:year} + B_{20} \text{Jul:year} + B_{21} \text{Aug:year} + B_{22} \text{Sep:year} + B_{23} \text{Oct:year} + B_{24} \text{Nov:year} + B_{25} \text{Dic:year}$$

**Figure S.1.b.** Observed and predicted numbers of cardiovascular deaths between 2015 and 2020 without the inclusion of the seasonal component, Chile.

Panel A. Both sexes

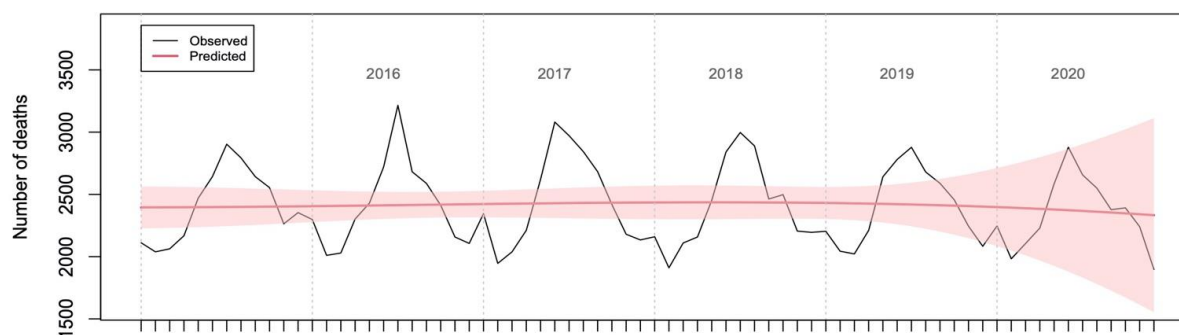

Panel B. Male

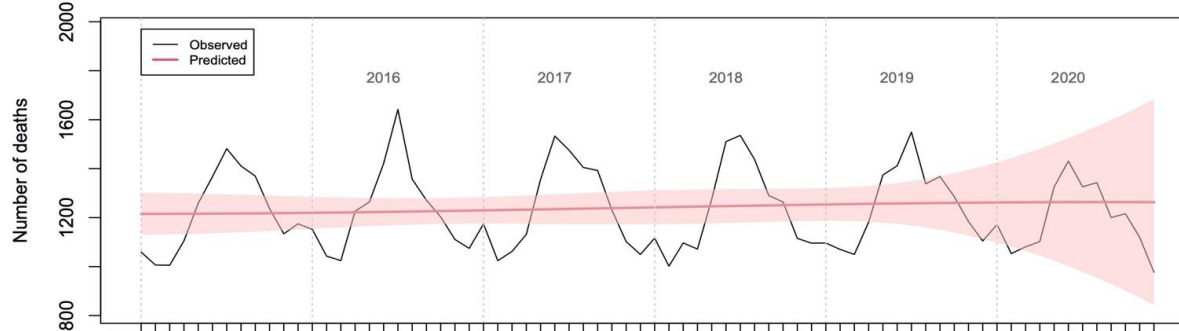

Panel C. Female

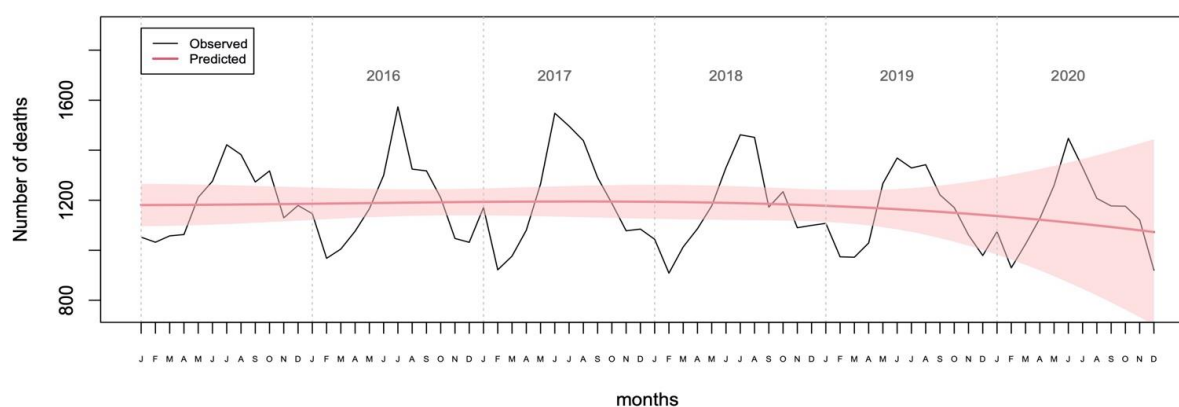

The selected after the backward procedure for both sexes, men and female, without seasonal component are represented by:

$$\text{number of deaths} = B_0\text{intercept} + B_1\text{month}^2 + B_2\text{month}^3$$

**Figure S.2.a.** Observed and predicted numbers of deaths from ischemic heart diseases between 2015 and 2020, and monthly attributable fraction for 2020. Chile

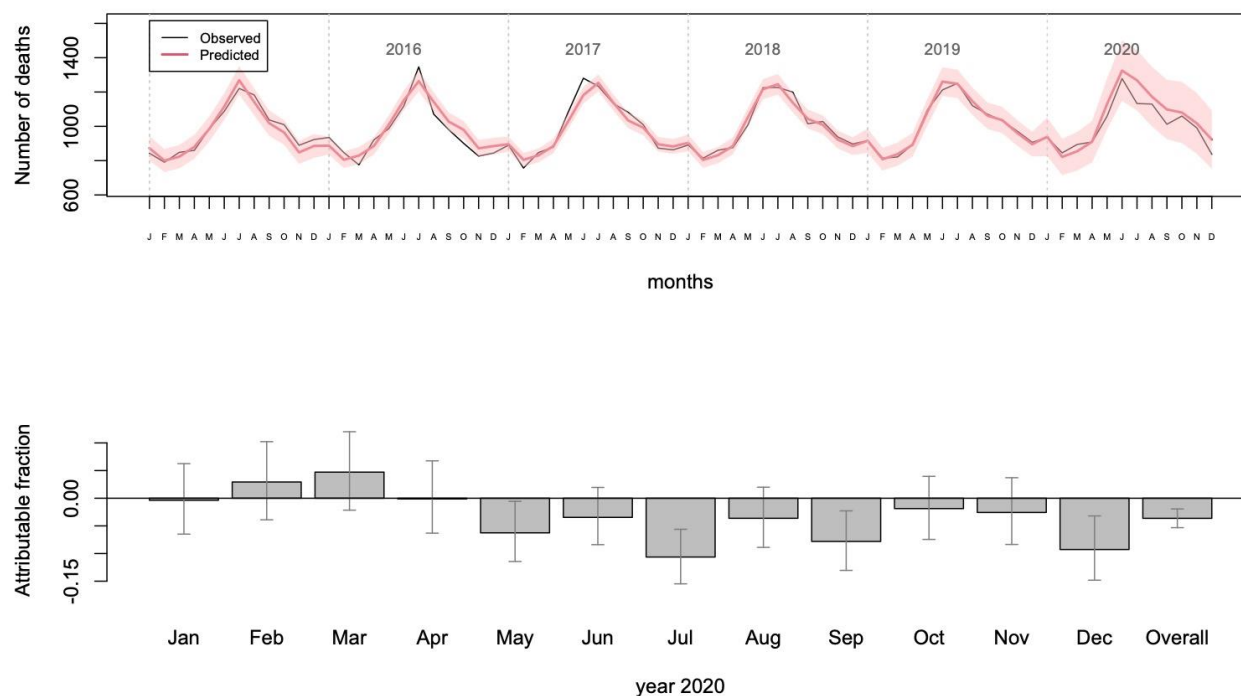

The selected model after the backward procedure was:

$$\text{number of deaths} = B_0 \text{intercept} + B_1 \text{month}^2 + B_2 \text{month}^3 + B_3 \text{Feb} + B_4 \text{Mar} + B_5 \text{Apr} + B_6 \text{May} + B_7 \text{Jun} + B_8 \text{Jul} + B_9 \text{Aug} + B_{10} \text{Sep} + B_{11} \text{Oct} + B_{12} \text{Nov} + B_{13} \text{Dec} + B_{14} \text{year} + B_{15} \text{Feb:year} + B_{17} \text{Mar:year} + B_{17} \text{Apr:year} + B_{18} \text{May:year} + B_{19} \text{Jun:year} + B_{20} \text{Jul:year} + B_{21} \text{Aug:year} + B_{22} \text{Sep:year} + B_{23} \text{Oct:year} + B_{24} \text{Nov:year} + B_{25} \text{Dec:year}$$

**Figure S.2.b.** Observed and predicted numbers of deaths from ischemic heart diseases between 2015 and 2020, without the seasonal component. Chile

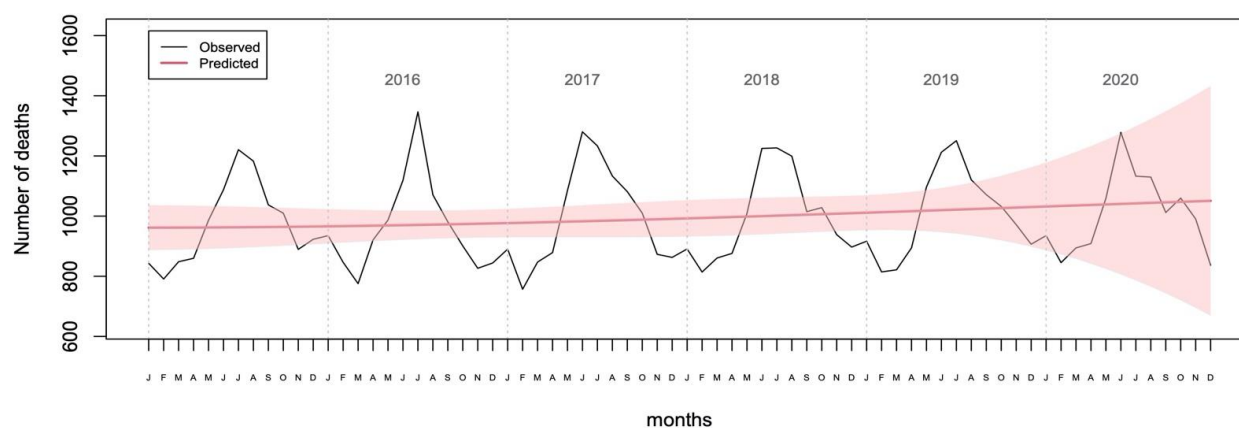

**Figure S.3.a** .Observed and predicted numbers of deaths from strokes between 2015 and 2020, and monthly attributable fraction for 2020. Chile

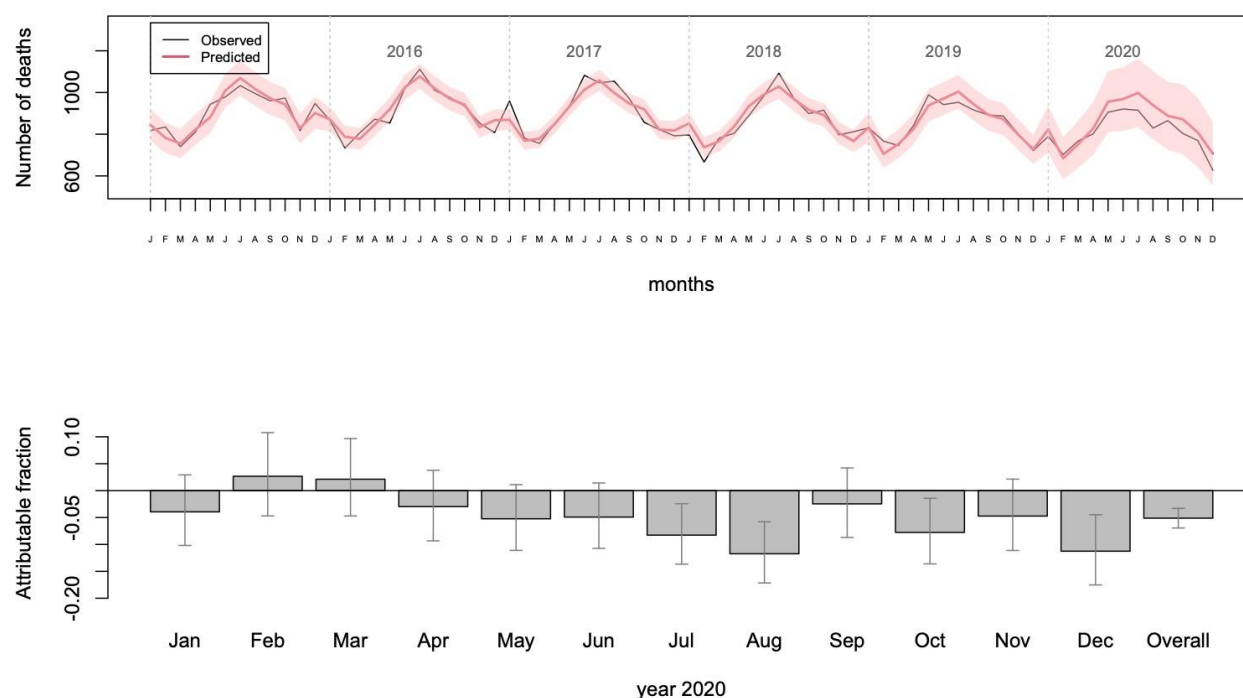

The selected model after the backward procedure was:

$$\begin{aligned} \text{number of deaths} = & B_0 \text{intercept} + B_1 \text{month}^2 + B_2 \text{month}^3 + B_3 \text{Feb} + B_4 \text{Mar} + B_5 \text{Apr} + B_6 \text{May} + B_7 \text{Jun} + B_8 \text{Jul} + B_9 \text{Aug} + B_{10} \text{Sep} + B_{11} \text{Oct} + B_{12} \text{Nov} + \\ & B_{13} \text{Dec} + B_{14} \text{year} + B_{15} \text{Feb:year} + B_{17} \text{Mar:year} + B_{17} \text{Apr:year} + B_{18} \text{May:year} + B_{19} \text{Jun:year} + B_{20} \text{Jul:year} + B_{21} \text{Aug:year} + B_{22} \text{Sep:year} + B_{23} \text{Oct:year} + \\ & B_{24} \text{Nov:year} + B_{25} \text{Dec:year} \end{aligned}$$

**Figure S.3.b.** Observed and predicted numbers of deaths from strokes between 2015 and 2020, without the seasonal component. Chile

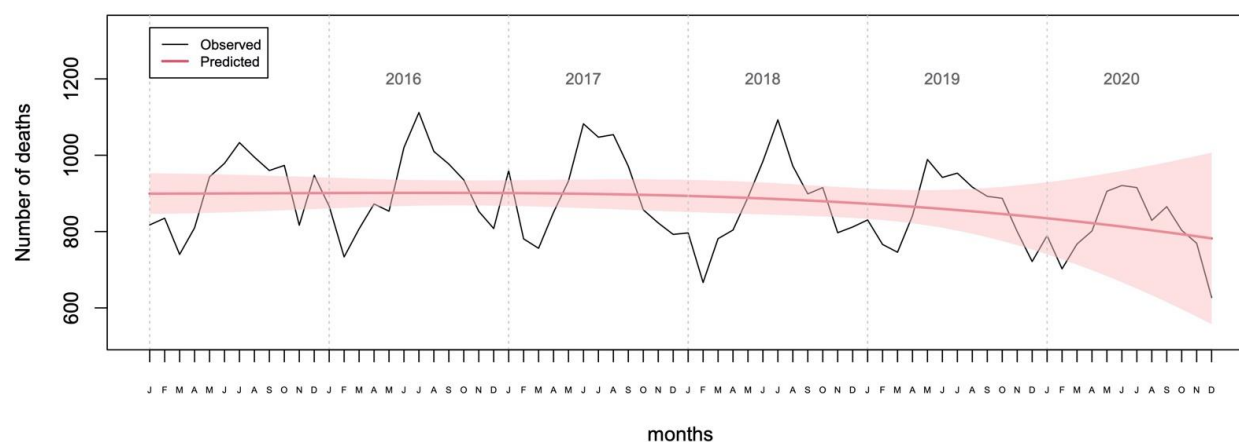

**Figure S.4.a.** Observed and predicted numbers of deaths from hypertensive heart diseases between 2015 and 2020, and monthly attributable fraction for 2020. Chile

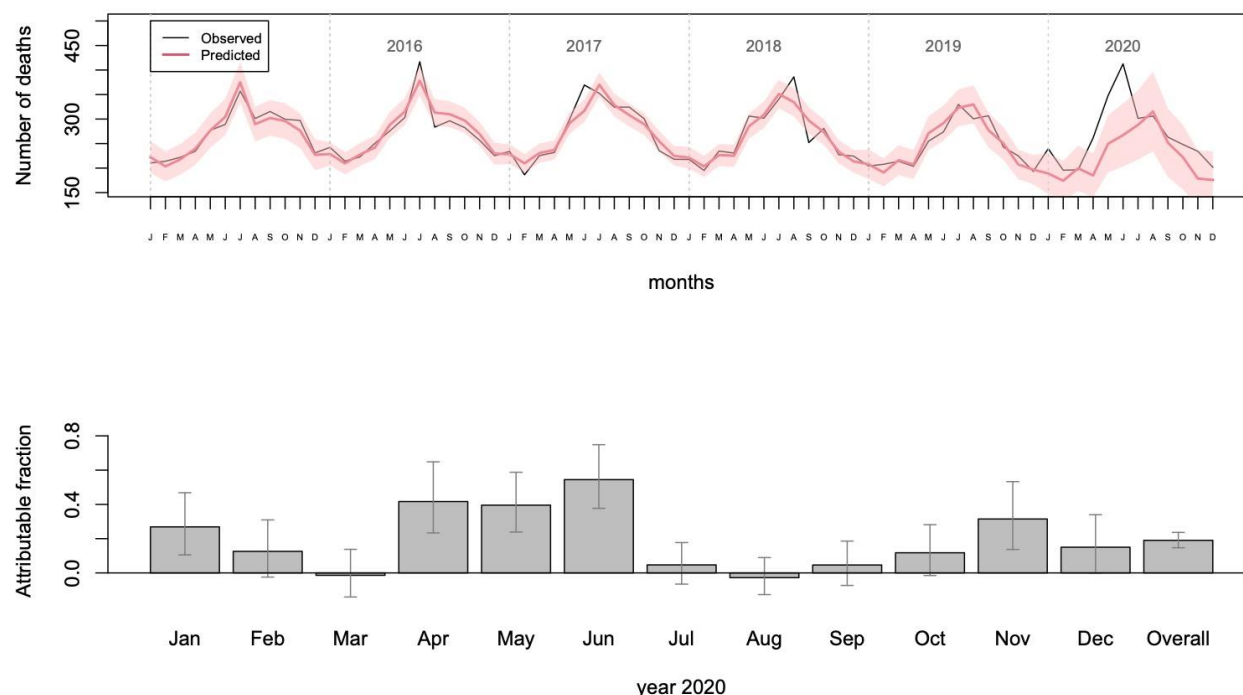

The selected model after the backward procedure was:

$$\text{number of deaths} = B_0 \text{intercept} + B_1 \text{month}^2 + B_2 \text{month}^3 + B_3 \text{Feb} + B_4 \text{Mar} + B_5 \text{Apr} + B_6 \text{May} + B_7 \text{Jun} + B_8 \text{Jul} + B_9 \text{Aug} + B_{10} \text{Sep} + B_{11} \text{Oct} + B_{12} \text{Nov} + B_{13} \text{Dec} + B_{14} \text{year} + B_{15} \text{Feb:year} + B_{17} \text{Mar:year} + B_{17} \text{Apr:year} + B_{18} \text{May:year} + B_{19} \text{Jun:year} + B_{20} \text{Jul:year} + B_{21} \text{Aug:year} + B_{22} \text{Sep:year} + B_{23} \text{Oct:year} + B_{24} \text{Nov:year} + B_{25} \text{Dec:year}$$

**Figure S.4.b.** Observed and predicted numbers of deaths from hypertensive heart diseases between 2015 and 2020, without the seasonal component. Chile

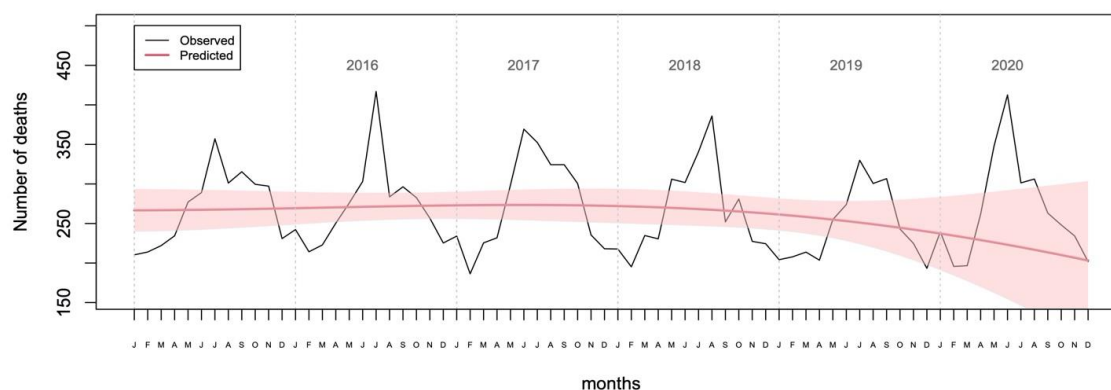

**Figure S.5.a.** Observed and predicted numbers of deaths from miscellaneous cardiovascular diseases between 2015 and 2020, and monthly attributable fraction for 2020.Chile

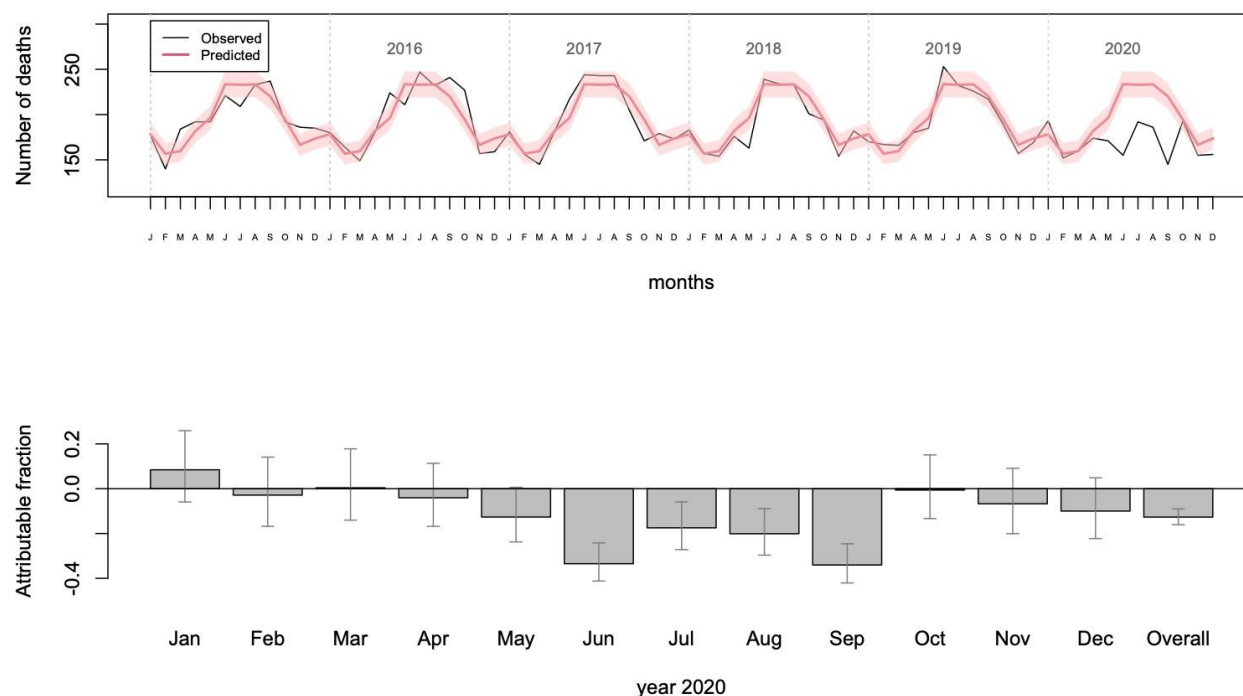

The selected model after the backward procedure was:

$$\text{number of deaths} = B_0 \text{intercept} + B_1 \text{Feb} + B_2 \text{Mar} + B_3 \text{Apr} + B_4 \text{May} + B_5 \text{Jun} + B_6 \text{Jul} + B_7 \text{Aug} + B_8 \text{Sep} + B_9 \text{Oct} + B_{10} \text{Nov} + B_{11} \text{Dic}$$

**Figure S.6.b.** Observed and predicted numbers of deaths from miscellaneous cardiovascular diseases between 2015 and 2020, without the seasonal component. Chile

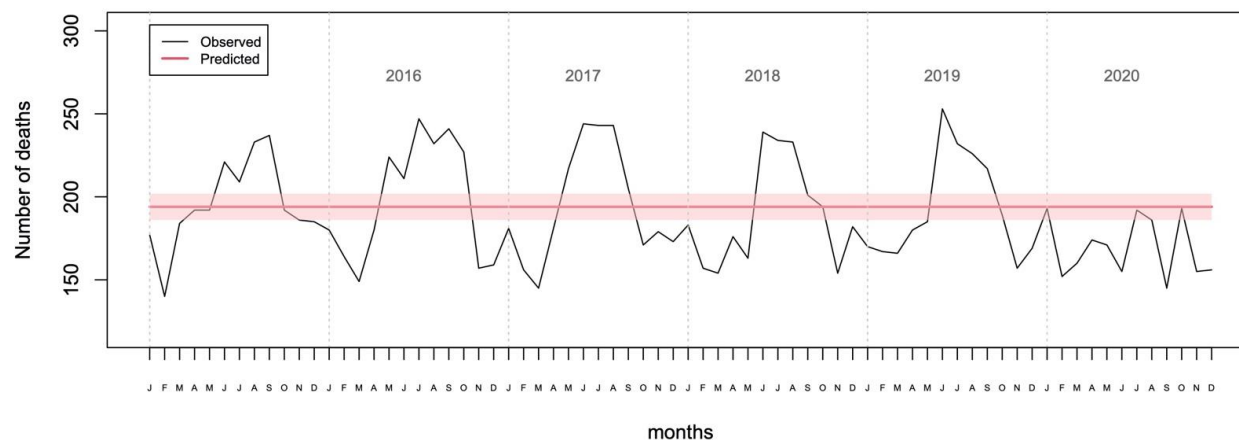



**Figure S.6.a.** Observed and predicted numbers of deaths from other cardiovascular diseases between 2015 and 2020, and monthly attributable fraction for 2020. Chile

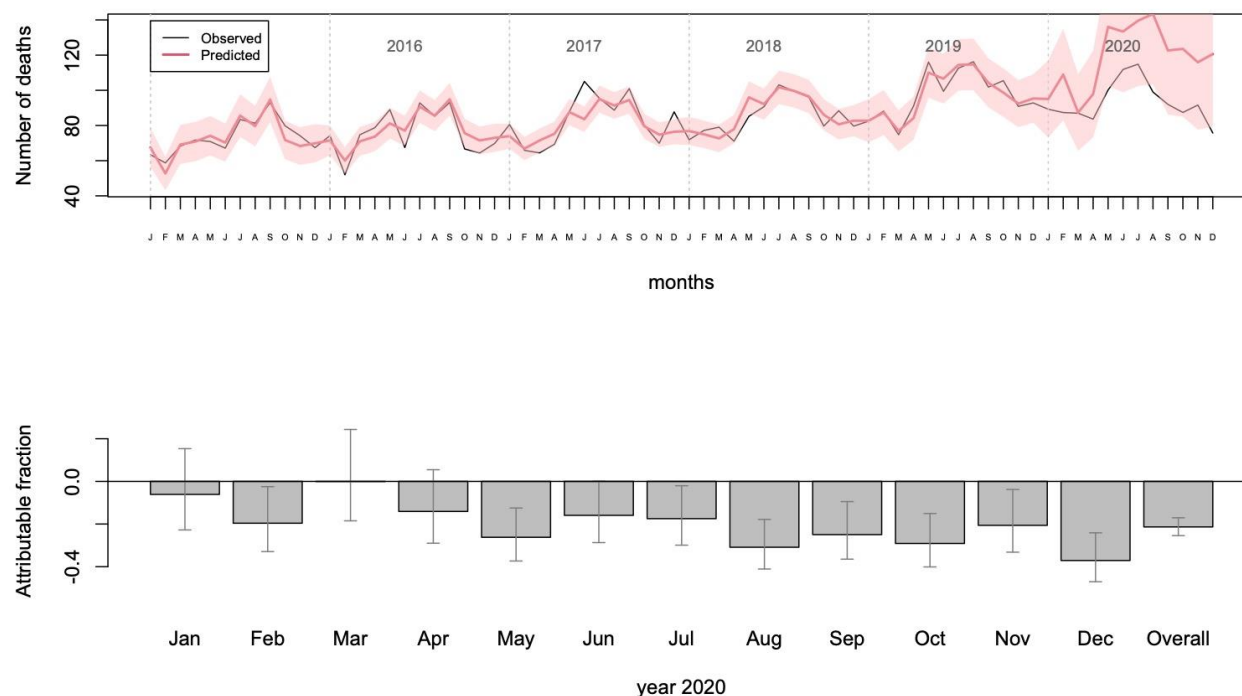

The selected model after the backward procedure was:

$$\text{number of deaths} = B_0\text{intercept} + B_1\text{month}^2 + B_2\text{month}^3 + B_3\text{Feb} + B_4\text{Mar} + B_5\text{Apr} + B_6\text{May} + B_7\text{Jun} + B_8\text{Jul} + B_9\text{Aug} + B_{10}\text{Sep} + B_{11}\text{Oct} + B_{12}\text{Nov} + B_{13}\text{Dec} + B_{14}\text{year} + B_{15}\text{Feb:year} + B_{17}\text{Mar:year} + B_{17}\text{Apr:year} + B_{18}\text{May:year} + B_{19}\text{Jun:year} + B_{20}\text{Jul:year} + B_{21}\text{Aug:year} + B_{22}\text{Sep:year} + B_{23}\text{Oct:year} + B_{24}\text{Nov:year} + B_{25}\text{Dec:year}$$

**Figure S.6.b.** Observed and predicted numbers of deaths from other cardiovascular diseases between 2015 and 2020, without the seasonal component. Chile

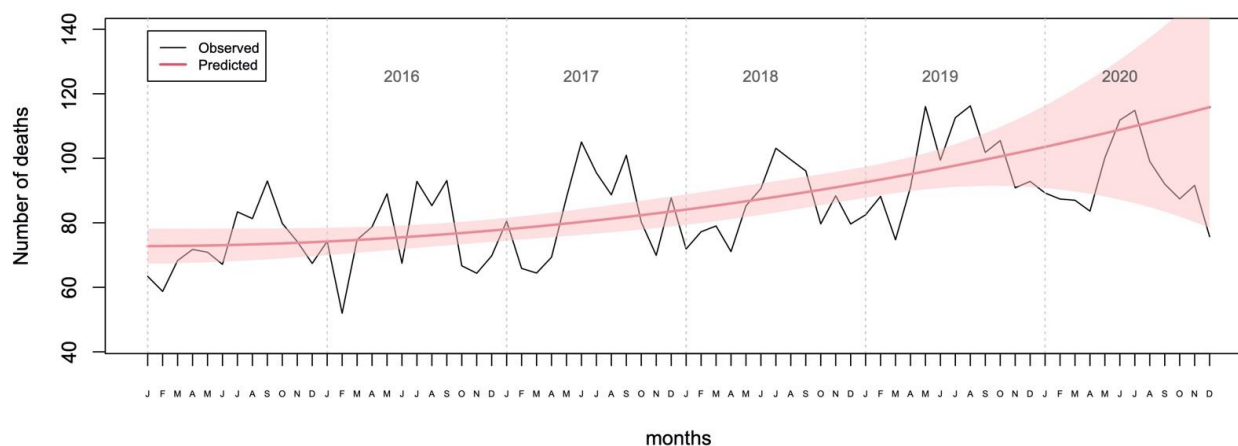

**Figure S.7.** Monthly deaths by COVID-19 during 2020 in Chile

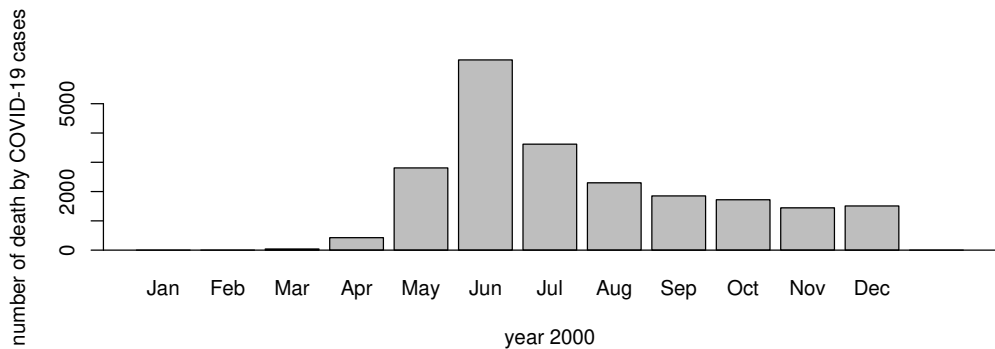



**Table S.1.** Distribution of deaths by cardiovascular diseases observed in period 2015-2019 and 2020, according to sex, age group, and types of cardiovascular disease, **without redistribution of garbage codes (sensitivity analysis 2)**.

|                                       | n= 82,211 | N= 15,324 |
|---------------------------------------|-----------|-----------|
|                                       | 2015-2019 | 2020      |
| Female (%)                            | 45.6      | 45.2      |
| Age groups (%)                        |           |           |
| <40                                   | 1.6       | 1.7       |
| 40-59                                 | 14.0      | 13.9      |
| 60-69                                 | 17.2      | 17.2      |
| 70-79                                 | 24.4      | 24.0      |
| 80-89                                 | 28.8      | 27.7      |
| >89                                   | 13.9      | 15.4      |
| Types of cardiovascular diseases (%)  |           |           |
| Ischemic Heart Diseases               | 49.8      | 49.7      |
| Strokes                               | 19.2      | 19.8      |
| Hypertensive Heart Diseases           | 14.2      | 14.3      |
| Miscellaneous Cardiovascular Diseases | 14.2      | 13.3      |
| Other Cardiovascular Diseases         | 2.7       | 2.9       |

**Table S.2.** Deaths in excess (attributional fraction) estimated for 2020 by cardiovascular diseases, according to gender, age group, and type of cardiovascular disease, following sensitivity analysis 1 (Using the same regression model for all estimates, without allowing cubic terms neither interaction terms) and 2 (without redistribution of garbage codes).

|                        |                               | Using the same regression model for all estimates,<br>without allowing cubic terms neither interaction terms<br>(sensitivity analysis 1) |                   | Without redistribution of garbage codes (sensitivity<br>analysis 2) |                   |
|------------------------|-------------------------------|------------------------------------------------------------------------------------------------------------------------------------------|-------------------|---------------------------------------------------------------------|-------------------|
|                        |                               | Median (%)                                                                                                                               | UI [2.5% - 97.5%] | Median (%)                                                          | UI [2.5% - 97.5%] |
| Overall                |                               | -0.2                                                                                                                                     | [-1.3 to 1.0]     | -6.8                                                                | [-8.2 to -5.4]    |
| Gender                 |                               |                                                                                                                                          |                   |                                                                     |                   |
|                        | Men                           | -3.7                                                                                                                                     | [-5.2 to -2.1]    | -11.9                                                               | [-13.6 to -10.1]  |
|                        | Women                         | 3.7                                                                                                                                      | [1.9 to 5.4]      | 0.3                                                                 | [-2.0 to 2.7]     |
| Age group              |                               |                                                                                                                                          |                   |                                                                     |                   |
|                        | 40-59                         | -5.2                                                                                                                                     | [-8.6 to -1.8]    | -7.9                                                                | [-11.5 to -4.1]   |
|                        | 60-69                         | -9.9                                                                                                                                     | [-12.5 to -7.1]   | -24.5                                                               | [-27.0 to -21.9]  |
|                        | 70-79                         | -2.9                                                                                                                                     | [-5.2 to -0.6]    | -8.5                                                                | [-11.3 to -5.6]   |
|                        | 80-89                         | 4.5                                                                                                                                      | [2.4 to 6.8]      | 9.7                                                                 | [6.2 to 13.2]     |
|                        | >89                           | 7.7                                                                                                                                      | [4.9 to 10.6]     | -11.2                                                               | [-14.5 to -7.7]   |
| Cardiovascular disease |                               |                                                                                                                                          |                   |                                                                     |                   |
|                        | Ischaemic Heart Disease       | -2.3                                                                                                                                     | [-3.9 to -0.6]    | -8.9                                                                | [-10.9 to -7.0]   |
|                        | Stroke                        | 0.2                                                                                                                                      | [-1.7 to 2.2]     | -14.1                                                               | [-16.8 to -11.2]  |
|                        | Hypertensive Heart Disease    | 19.3                                                                                                                                     | [14.8 to 23.9]    | 22.4                                                                | [16.9 to 28.3]    |
|                        | Miscellaneous                 | -9.2                                                                                                                                     | [-12.9 to -5.4]   | -12.7                                                               | [-16.1 to -9.0]   |
|                        | Other Cardiovascular Diseases | -13.7                                                                                                                                    | [-18.3 to -8.8]   | -21.9                                                               | [-27.9 to -15.1]  |

UI: uncertainty intervals (quantiles 2.5 – 97.5)

**Table S.3.** Deaths in excess (attributional fraction) estimated for 2020 by type of cardiovascular diseases, according to sex, age group, and sex-age groups.

| Sex               | Ischemic Heart Disease |                       | Stroke     |                       | Hypertensive Heart Disease |                       | Miscellaneous |                       | Other CVDs |                       |
|-------------------|------------------------|-----------------------|------------|-----------------------|----------------------------|-----------------------|---------------|-----------------------|------------|-----------------------|
|                   | Median (%)             | UI (%) [2.5% - 97.5%] | Median (%) | UI (%) [2.5% - 97.5%] | Median (%)                 | UI (%) [2.5% - 97.5%] | Median (%)    | UI (%) [2.5% - 97.5%] | Median (%) | UI (%) [2.5% - 97.5%] |
| Men               | -9.5                   | [-11.5 to -7.4]       | -16.5      | [-18.6 to -14.3]      | 11.1                       | [5.0 to 17.6]         | -12.3         | [-17.1 to -7.1]       | -27.4      | [-32.3 to -21.8]      |
| Women             | 4.3                    | [1.6 to 7.2]          | 7.1        | [4.2 to 10.3]         | 25.2                       | [19.1 to 31.7]        | -6.3          | [-11.6 to -0.4]       | -15.7      | [-21.6 to -9.0]       |
| Age group         |                        |                       |            |                       |                            |                       |               |                       |            |                       |
| 40-59             | -6.6                   | [-10.8 to -1.9]       | 3.4        | [-3.5 to 10.9]        | 43.2                       | [21.9 to 70.5]        | 30.7          | [12.2 to 53.7]        | -45.7      | [-51.3 to -39.1]      |
| 60-69             | -22.6                  | [-25.5 to -19.5]      | -22.9      | [-26.7 to -18.8]      | -6.9                       | [-16.1 to 3.7]        | -27.5         | [-34 to -20.2]        | 7          | [-6.9 to 24.5]        |
| 70-79             | -15.1                  | [-17.9 to -12.1]      | -17.2      | [-20.2 to -14]        | -8.9                       | [-15.4 to -1.8]       | -18.2         | [-24.5 to -11.1]      | -30.5      | [-37.3 to -22.6]      |
| 80-89             | 23.7                   | [19.2 to 28.5]        | 5.8        | [2.2 to 9.5]          | 27.2                       | [19.0 to 36.0]        | -14.9         | [-20.8 to -8.6]       | -34.4      | [-40.1 to -28.1]      |
| >89               | -2.3                   | [-6.1 to 1.7]         | 0.4        | [-3.8 to 4.9]         | 36.1                       | [26.3 to 46.7]        | -32.7         | [-38.2 to -26.8]      | 26.9       | [7.5 to 50.6]         |
| Age group, Male   |                        |                       |            |                       |                            |                       |               |                       |            |                       |
| 40-59             | -10.9                  | [-15.6 to -5.9]       | 10.3       | [0.6 to 21.1]         | 88.5                       | [50.1 to 142.6]       | 63.6          | [34.0 to 102.8]       | -55.1      | [-61 to -48]          |
| 60-69             | -29.3                  | [-32.3 to -26.0]      | -36.8      | [-40.4 to -32.9]      | 13                         | [-2.7 to 31.9]        | -7.3          | [-18.7 to 6.4]        | 54.4       | [21.8 to 101.1]       |
| 70-79             | -15.8                  | [-19.3 to -11.9]      | -26.1      | [-29.4 to -22.5]      | -13.9                      | [-22.3 to -4.2]       | -16.2         | [-24.8 to -6.2]       | -31.9      | [-40.4 to -21.9]      |
| 80-89             | 25.6                   | [18.9 to 32.7]        | -10.5      | [-14.7 to -6.2]       | 5                          | [-4.2 to 15.5]        | -13.4         | [-22.4 to -3.1]       | -60.9      | [-64.9 to -56.3]      |
| >89               | -17.4                  | [-22.6 to -11.8]      | -4.3       | [-11.1 to 3.2]        | 35.2                       | [17.6 to 56.8]        | -19.4         | [-31.7 to -3.6]       | 63.0       | [20.3 to 130.0]       |
| Age group, Female |                        |                       |            |                       |                            |                       |               |                       |            |                       |
| 40-59             | 9.1                    | [-1.5 to 21.4]        | -6.6       | [-15.7 to 4.1]        | -19.3                      | [-34.4 to 0.1]        | -21.2         | [-36.2 to -1.2]       | -33.6      | [-44.5 to -19.8]      |
| 60-69             | -3.6                   | [-10.8 to 4.8]        | 7.7        | [-1.9 to 18.8]        | -33.1                      | [-41.7 to -22.4]      | -10.0         | [-24.2 to 8.0]        | -27.0      | [-38.4 to -12.5]      |
| 70-79             | -13.9                  | [-18.6 to -8.8]       | -3.5       | [-9.3 to 3.0]         | -3.6                       | [-13.4 to 7.7]        | 5.6           | [-7.8 to 21.8]        | -27.7      | [-38.2 to -14.5]      |
| 80-89             | 22.2                   | [16.1 to 28.8]        | 21.5       | [15.5 to 27.8]        | 44.1                       | [31.8 to 57.6]        | -16           | [-23.3 to -7.9]       | -6.6       | [-18.5 to 8.6]        |
| >89               | 4.9                    | [-0.2 to 10.6]        | 2.6        | [-2.7 to 8.4]         | 36.7                       | [25.4 to 49.3]        | 2.6           | [-9.2 to 16.8]        | 10.4       | [-8.5 to 35.3]        |

UI: uncertainty intervals (quantiles 2.5 – 97.5)

Note: All disease categories include fracti
